# Supplementary material
Source: PubMed Central journal article supplement (PMC4432214)
Supplement: AAC.04494-14_zac005153967so1.pdf [file AAC.04494-14_zac005153967so1.pdf]

## Supplementary material

**Table S1. Surface binding of O25b specific mAbs to ST131 isolates of different PFGE types.**

| strain      | PFGE<br>(1) | 3E9-11 | 2A7-01 | 4D5-02 | control<br>IgG1 | secondary<br>control |
|-------------|-------------|--------|--------|--------|-----------------|----------------------|
|             |             | Median | Median | Median | Median          | Median               |
| L 52        | A           | 75052  | 44241  | 56999  | 189             | 192                  |
| ESBL 09.077 | B           | 24431  | 22816  | 20486  | 180             | 187                  |
| OH 16       | C           | 22875  | 14651  | 19070  | 180             | 186                  |
| MS 18       | D           | 25129  | 17237  | 20738  | 220             | 183                  |
| ESBL 10.573 | E           | 27653  | 43607  | 24149  | 183             | 184                  |
| ESBL 07.403 | F           | 27595  | 18243  | 21702  | 180             | 183                  |
| RG 06       | G           | 90500  | 58124  | 59972  | 198             | 189                  |
| MH 07       | H           | 40278  | 23972  | 27193  | 205             | 202                  |
| ESBL 09.151 | I           | 34493  | 21954  | 25264  | 198             | 183                  |
| EC NZ 26    | J           | 32958  | 25042  | 28155  | 201             | 190                  |
| EC NZ 94    | K           | 35286  | 25014  | 28072  | 190             | 192                  |
| dutchEC 45  | L           | 31204  | 20932  | 23379  | 189             | 189                  |
| WP 15       | M           | 165291 | 70712  | 61971  | 183             | 193                  |
| ESBL 07.391 | N           | 26752  | 17132  | 21654  | 178             | 180                  |
| ESBL 08.291 | O           | 180    | 187    | 181    | 186             | 194                  |
| 81009       | nd          | 41232  | 21887  | 29118  | 187             | 187                  |
| 3O          | nd          | 34948  | 36296  | 40488  | 192             | 192                  |

Binding of 3E9-11, 2A7-01 and 4D5-02 as well as control (irrelevant target) IgG1 mAb was tested at 40 µg/ml concentration in flow cytometry to the surface of ST131 strains. Representative isolates of different PFGE types originated (kindly provided by Gisele Peirano, University of Calgary, Canada) from an extensively characterized collection of ST131 isolates (1). Table shows median fluorescence intensity values measured.

### Reference:

1. **Peirano G, van der Bij AK, Freeman JL, Poirel L, Nordmann P, Costello M, Tchesnokova VL, Pitout JD.** 2014. Characteristics of Escherichia coli sequence type 131 isolates that produce extended-spectrum beta-lactamases: global distribution of the H30-Rx sublineage. *Antimicrob. Agents Chemother.* **58**:3762-3767.

Figure S1

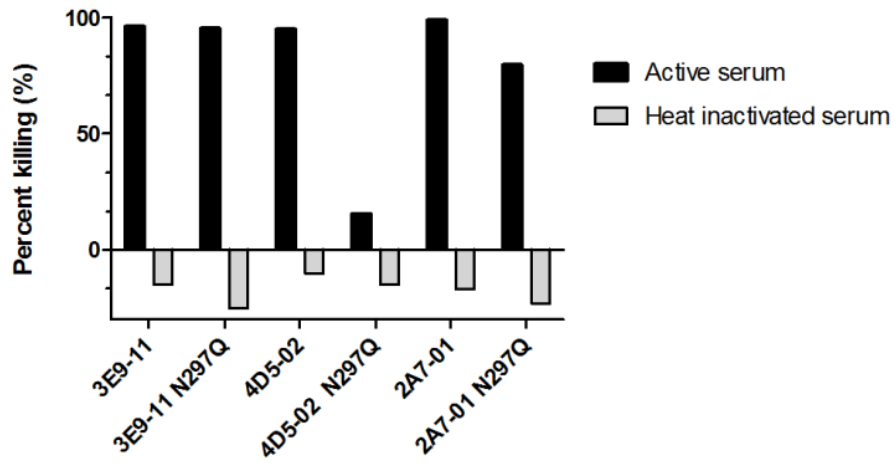

**Figure S1. Complement dependency of serum bactericidal assay.** *E. coli* O25b bacteria were incubated with glycosylated and aglycosylated mAbs in the presence of 50% depleted normal or heat inactivated (56°C for 40 min) human serum. Percent killing is expressed as CFU recovered in test groups relative to the control group (irrelevant IgG1 control) following a 3h incubation at 37°C.
